# Supplementary material for: Improvement in The Working Life of A Micro Journal Bearings With An Electroless Ni-P Coating
Source: Research Square preprint supplement (doi:10.21203/rs.3.rs-993715/v1), 2021-10-22
Supplement: Supplementary file 1 [file 106065671a4801e2d71fd353.docx]

Supplementary Material

-Ethical Approval: The manuscript of this paper is 100% original and unpublished and free from plagiarism and copyright infringement.

-Consent to Participate: Jin-Yih Kao

-Consent to Publish: If this paper is accepted, the author agrees with this paper to publish by [The International Journal of Advanced Manufacturing Technology](https://www.springer.com/journal/170/).

-Authors Contributions: I am a single author, so I complete this article independently.

Complete this article independently

独立完成本文

Complete this article by yourself

自己完成这篇文章

無法載入全部結果

再試一次

正在重試...

正在重試...

-Funding: Ministry of Science and Technology of the Republic of China, through Grant nos. MOST 109-2221-E-262-003.

-Competing Interests: No potential conflict of interest was reported by the authors.

-Availability of data and materials: The manuscript of this paper is 100% original, the data and materials can be available to publisher and reader.
